# Supplementary material for: Growth of human breast tissues from patient cells in 3D hydrogel scaffolds
Source: PubMed Central journal article supplement (PMC4772689; doi:10.1186/s13058-016-0677-5), 2016-03-01

Figure S1

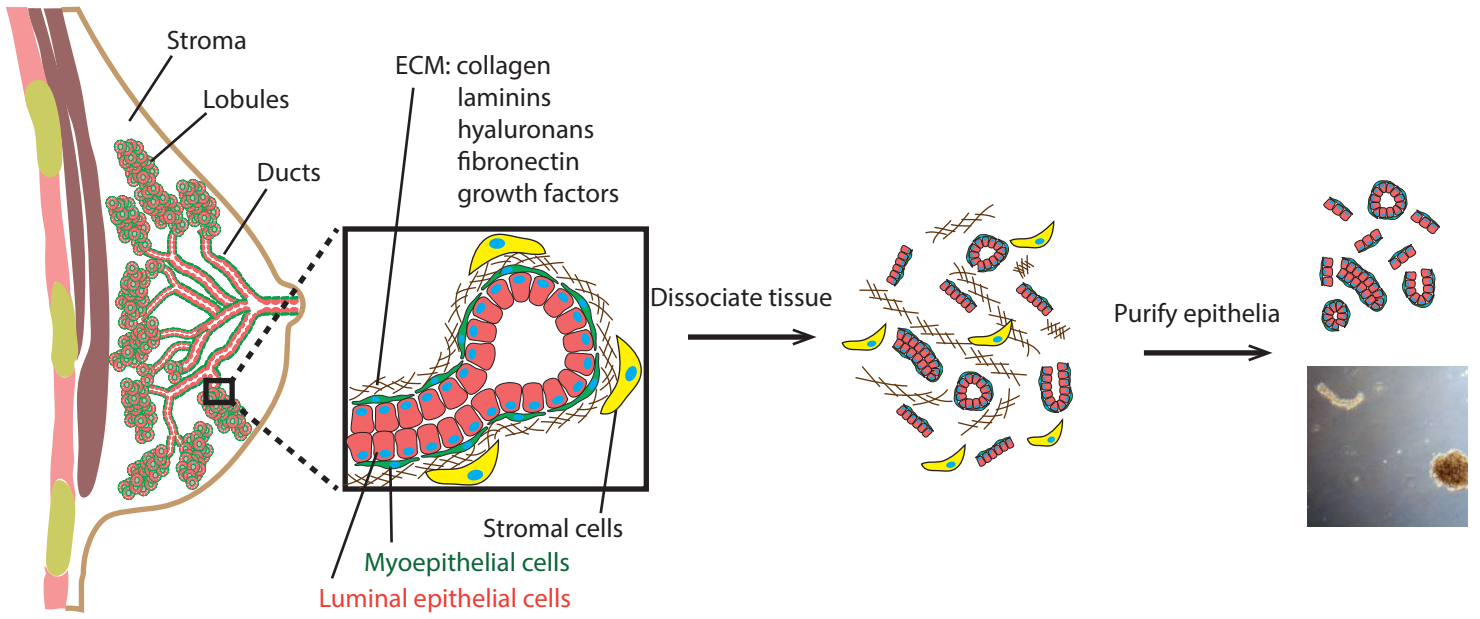

Figure S2

A

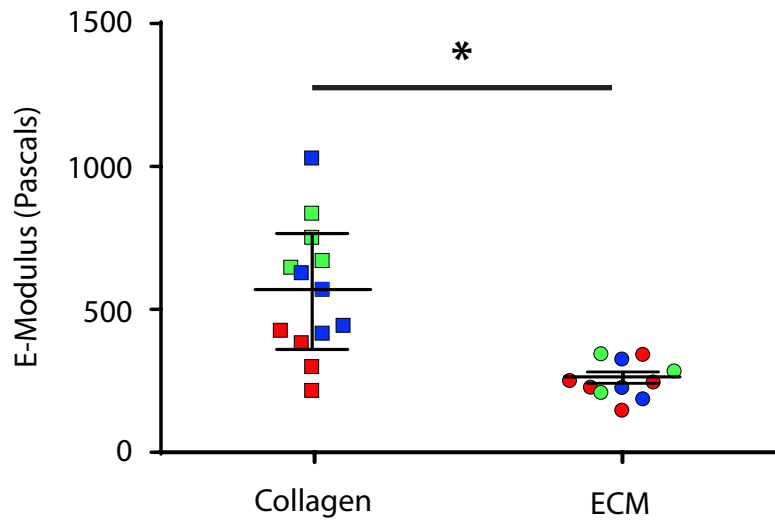

B

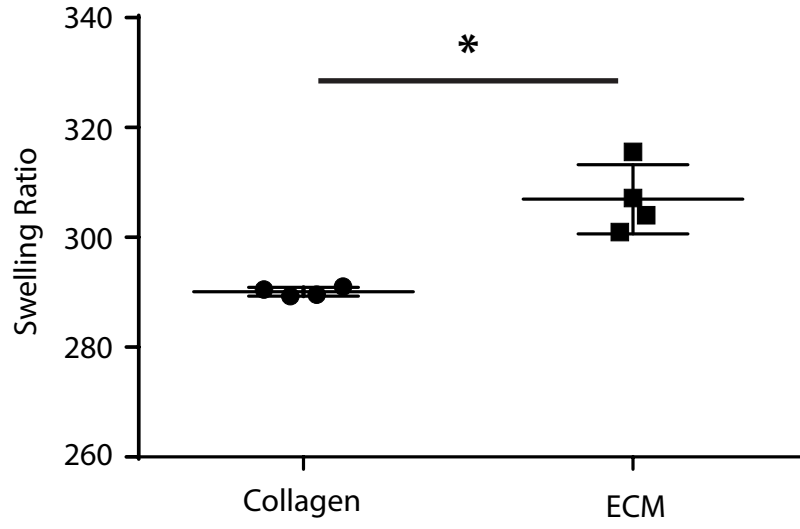

A

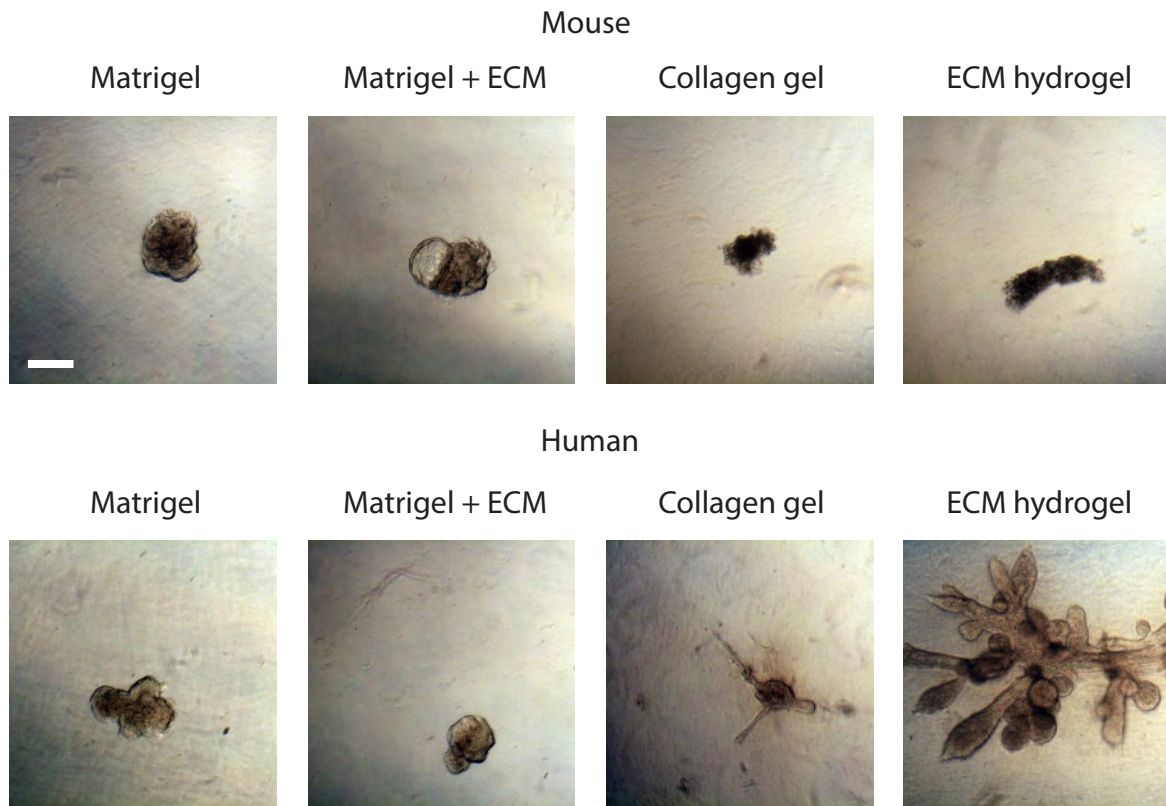

B

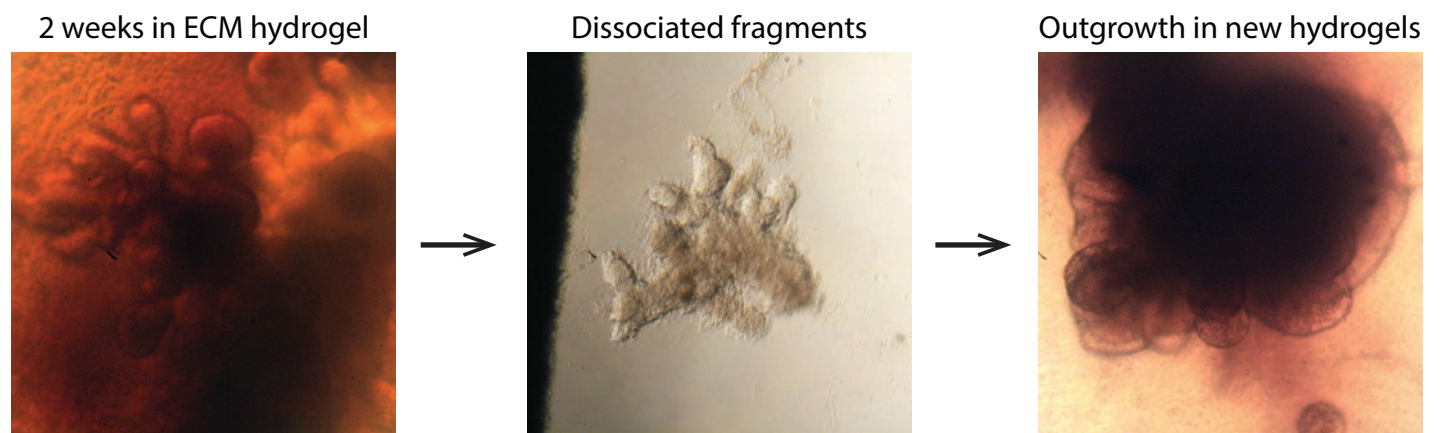

Ductal  
Only  
83.6% (n=112)

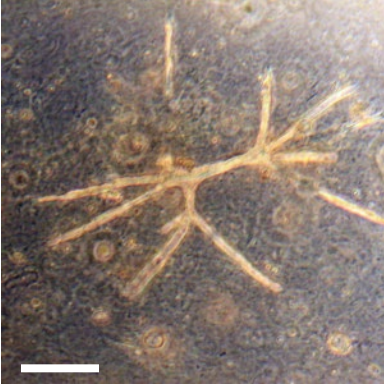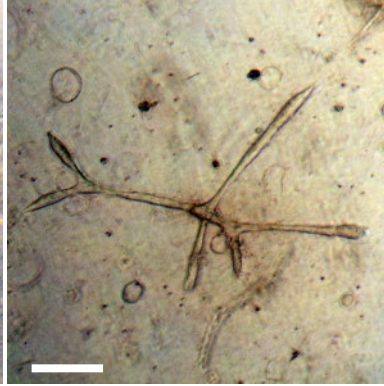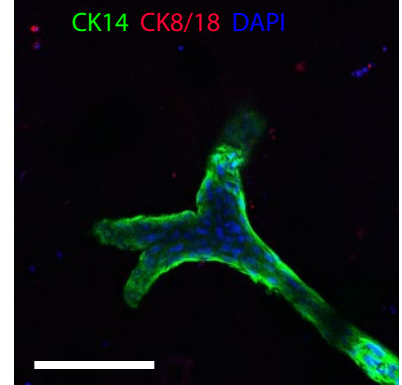

Lobular  
11.9% (n=16)

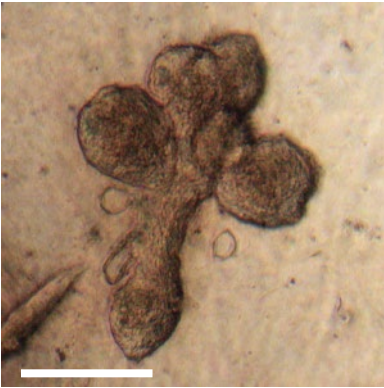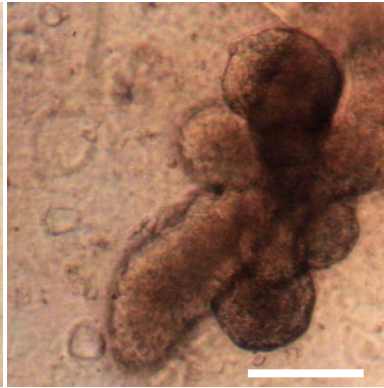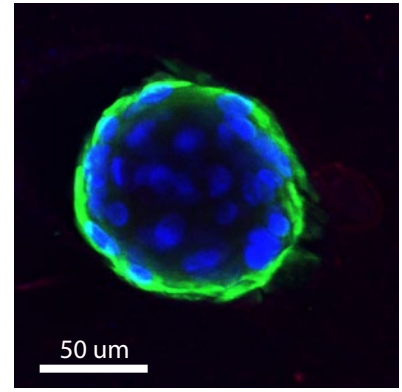

Mixed  
Architecture  
4.5% (n=6)

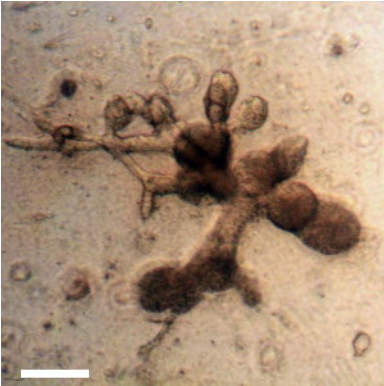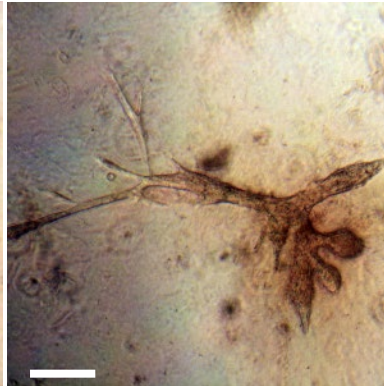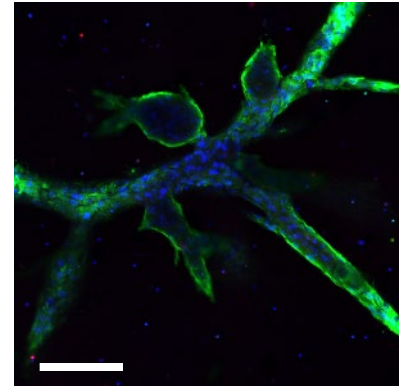

Figure S5

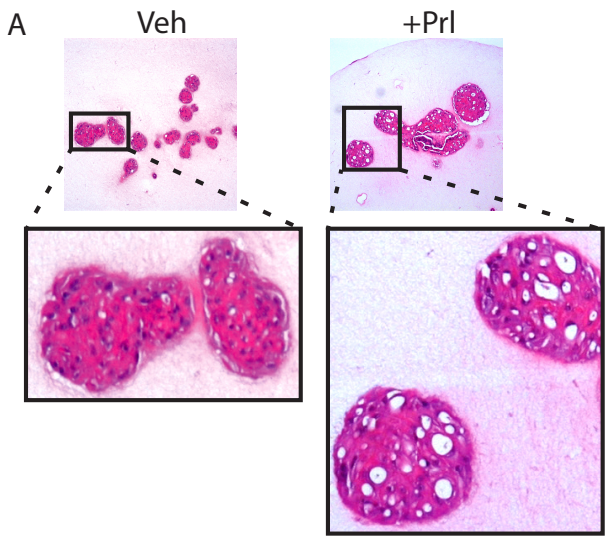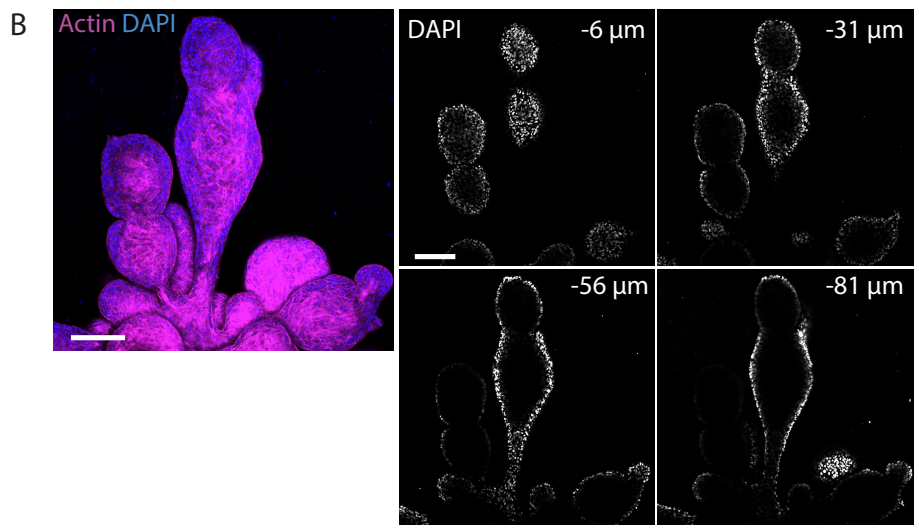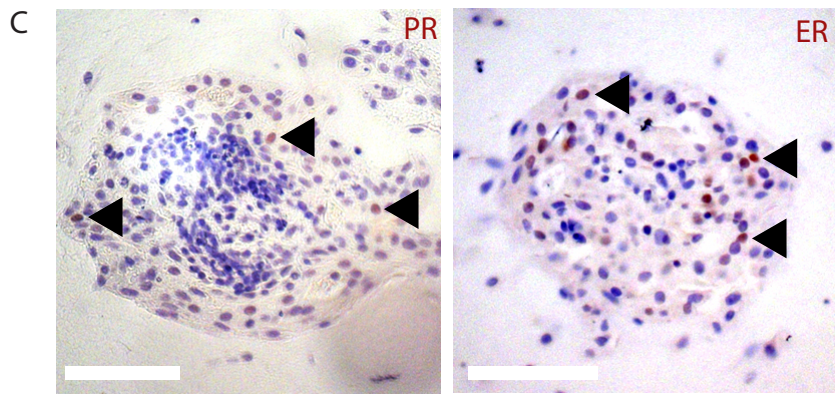

Figure S6

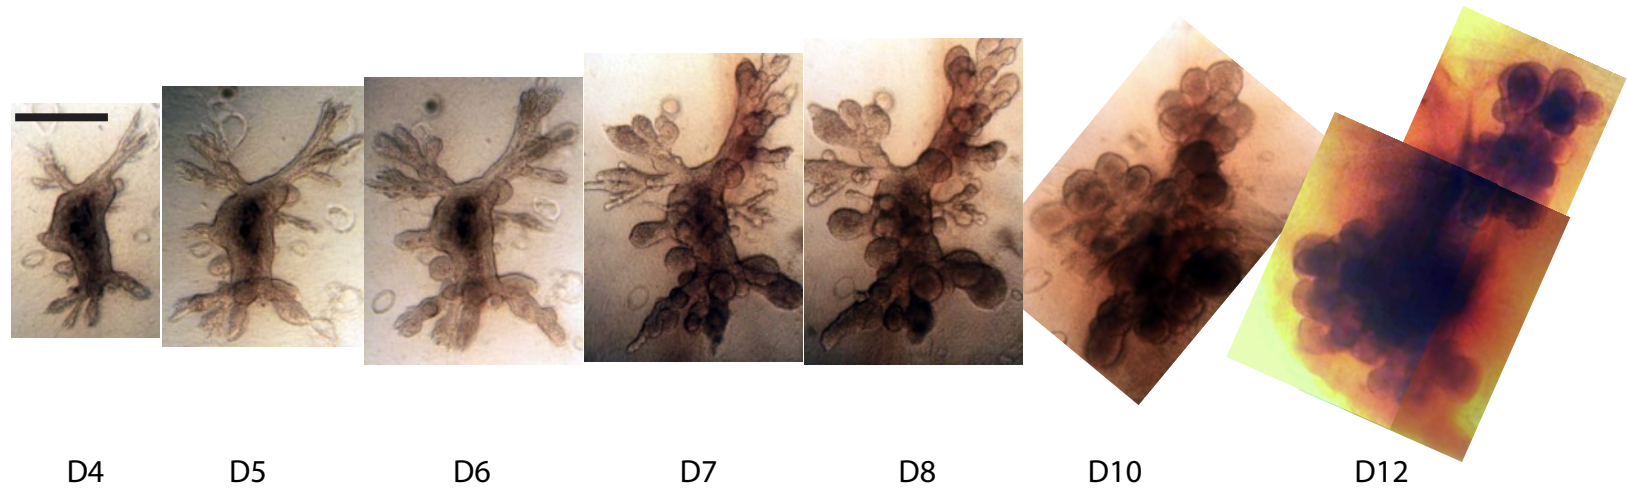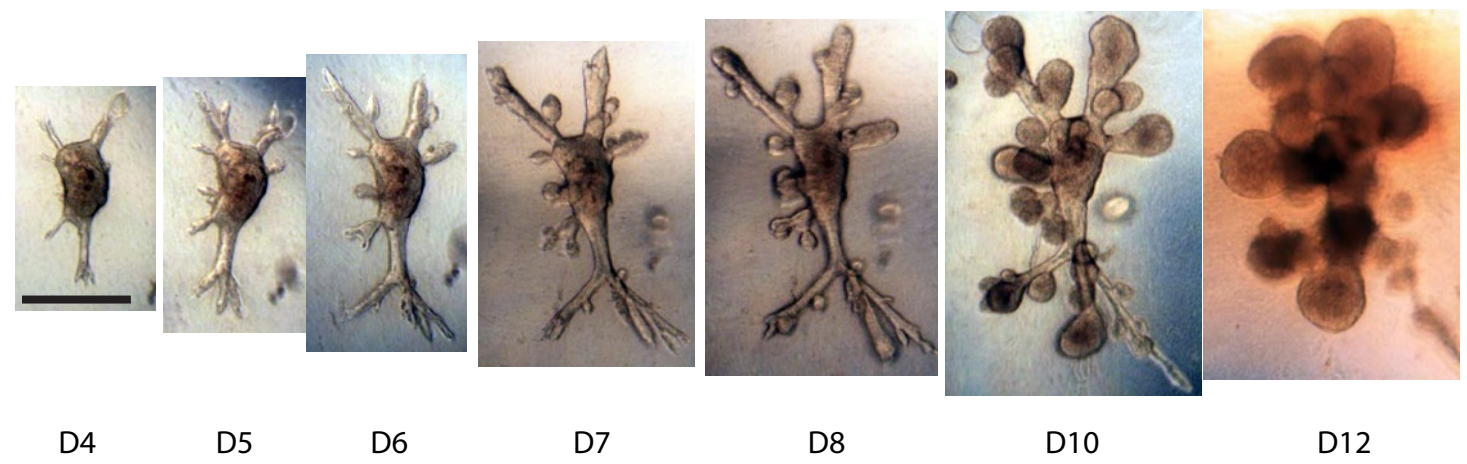

A

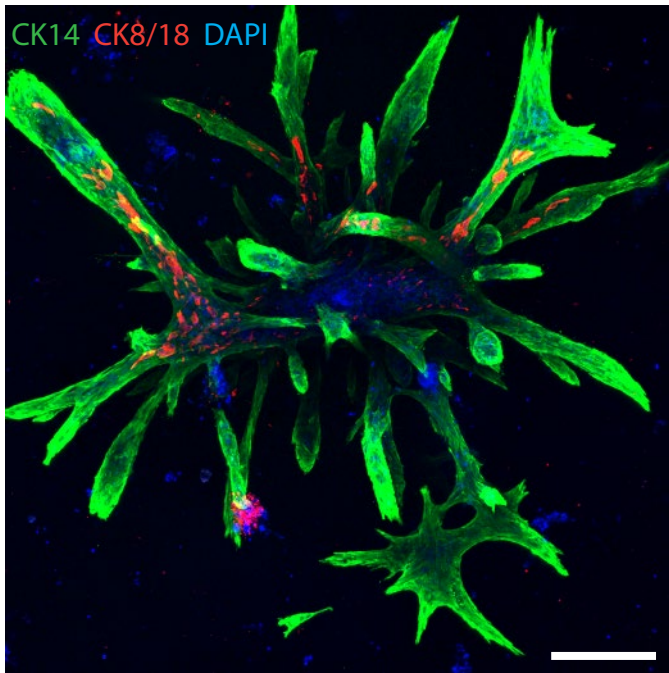

B

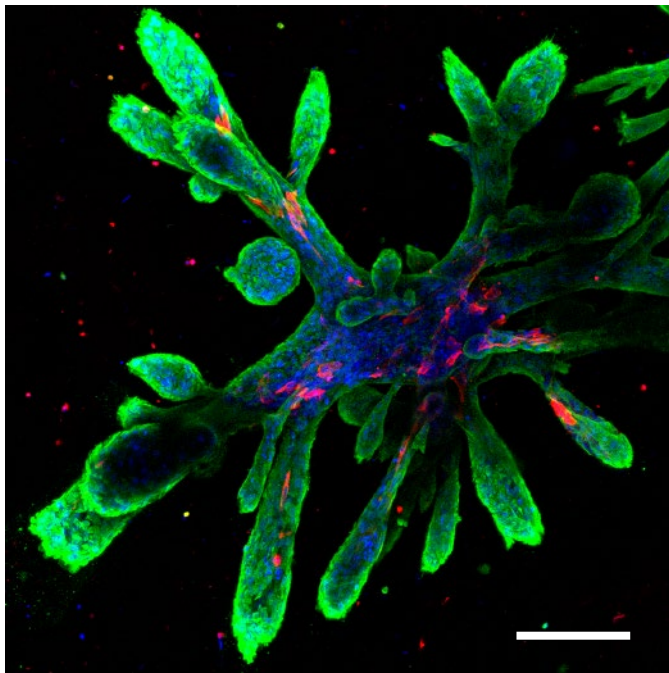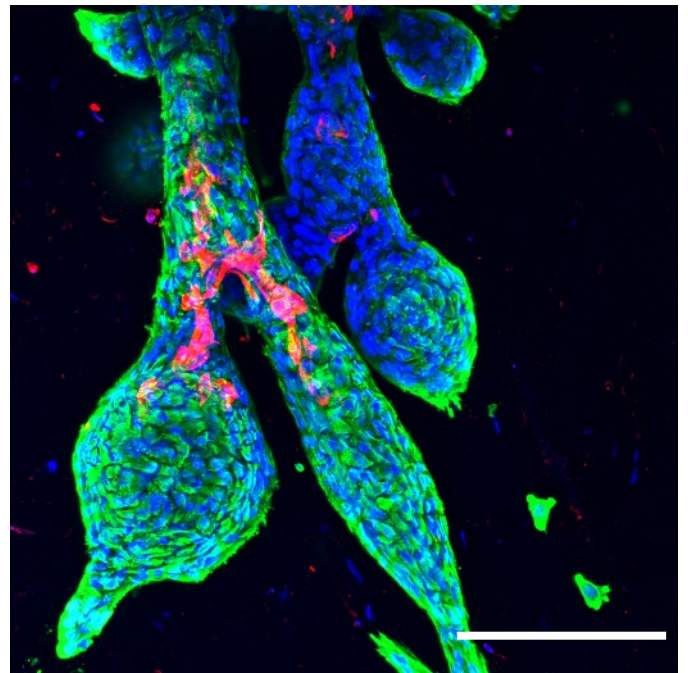

A

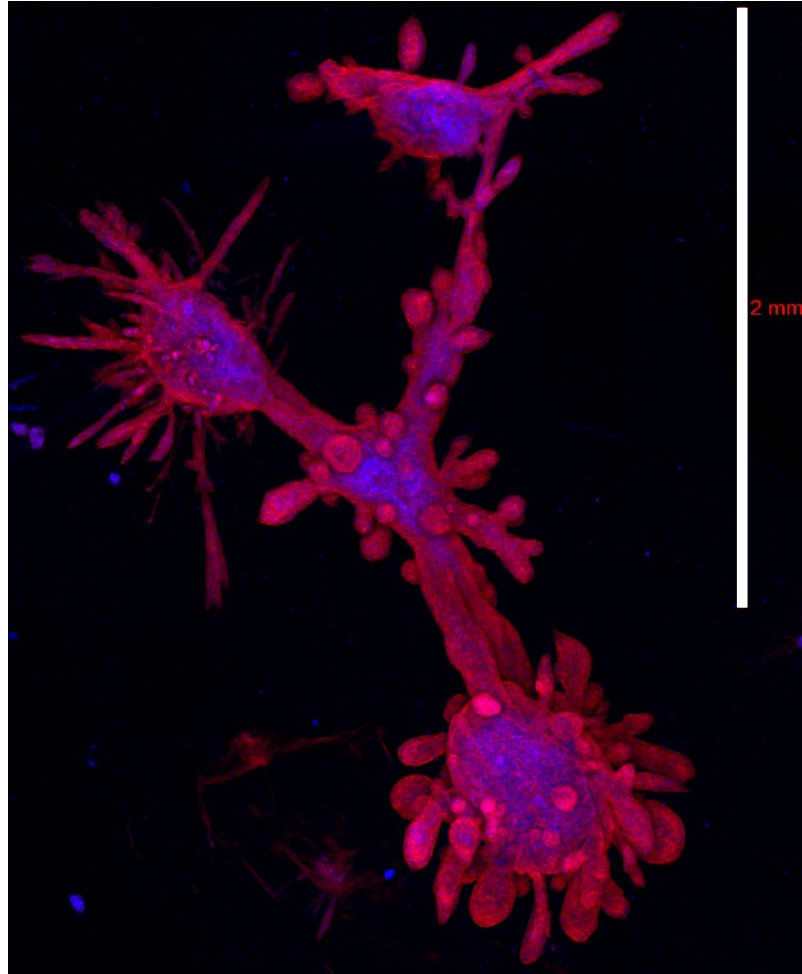

B

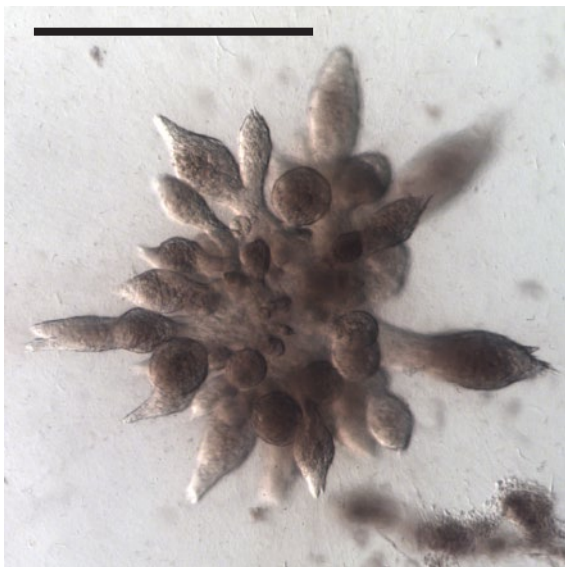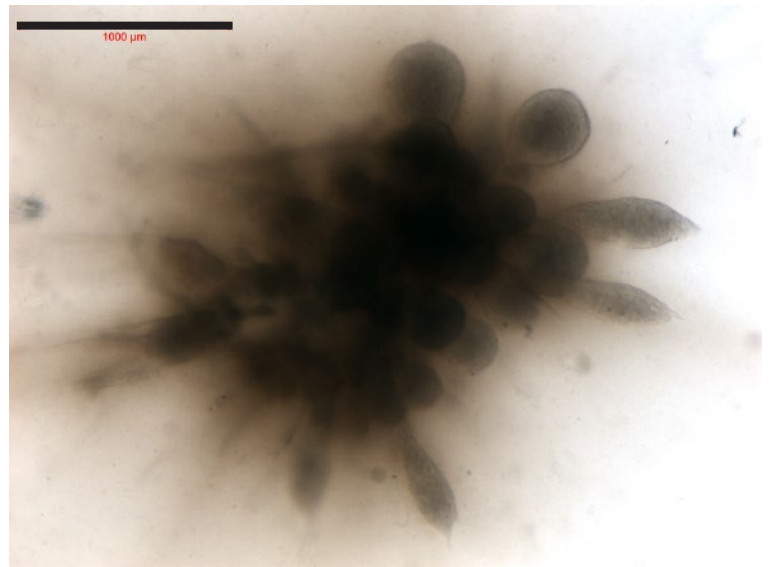



A

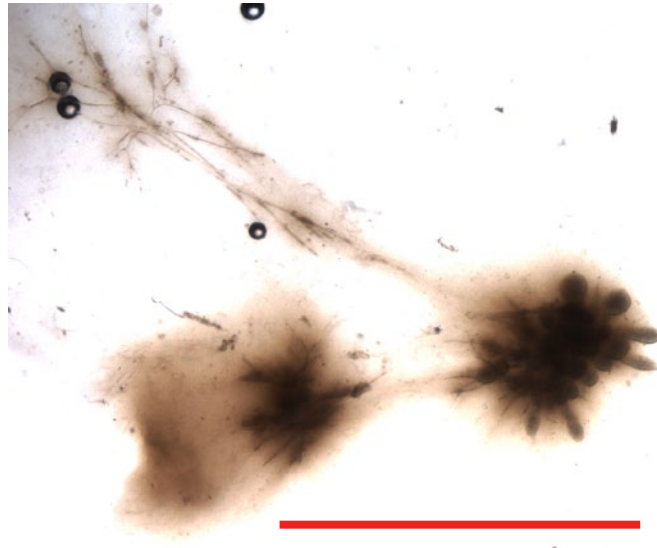

B

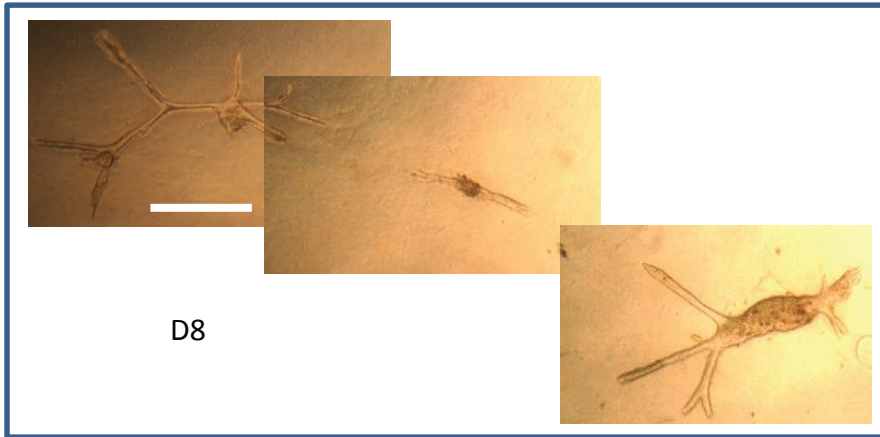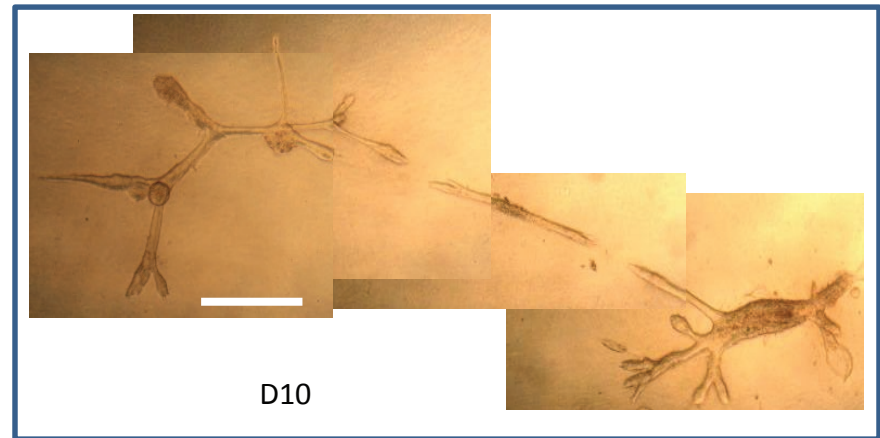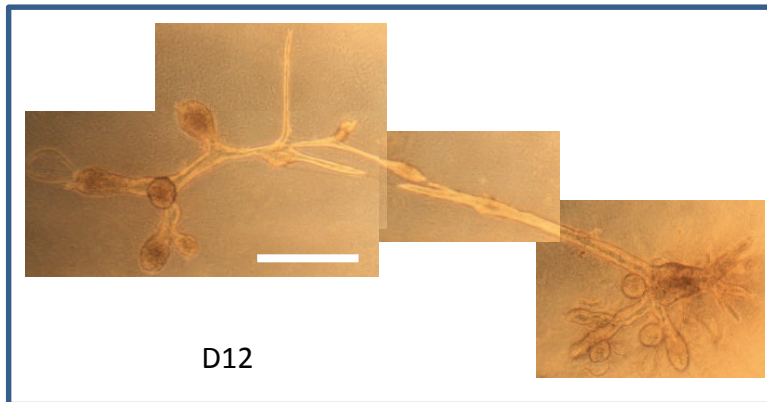

Supplement: 13058_2016_677_MOESM2_ESM.pdf [file 13058_2016_677_MOESM2_ESM.pdf]
